# Supplementary material for: Can language focussed activities improve understanding of chemical language in non-traditional students?
Source: Royal Society of Chemistry journal article supplement (doi:10.1039/c8rp00070k), 2018-01-01
Supplement: c8rp00070k1.pdf [file c8rp00070k1.pdf]

Appendix: Teaching timetable and associated language focused activities.

| Week         | Topic                                                                           | Summary content                                                                                                                                                                                                                                                                     | Vocabulary relevant to the chemical language assessment                                  | Language activity                                                          | Informed by                                                                                      |
|--------------|---------------------------------------------------------------------------------|-------------------------------------------------------------------------------------------------------------------------------------------------------------------------------------------------------------------------------------------------------------------------------------|------------------------------------------------------------------------------------------|----------------------------------------------------------------------------|--------------------------------------------------------------------------------------------------|
| 1<br>October | Atomic structure<br>Elements and compounds                                      | Development of ideas of atomic structure<br><br>Explanation of the Bohr model<br><br>Determining number of protons, electrons and neutrons<br><br>Chemical reactions to illustrate chemical change, explore understanding of elements and compounds and chemical reactions.         | atom, molecule, element, compound, combustion, neutral                                   | Chemical language assessment (CLA)<br><br>Personal Glossaries<br><br>FOCUS | Pyburn et al. (2013)<br><br>Wellington and Osborne (2001).<br><br>ZPD (Vygotsky, 1962)           |
| 2            | Relative atomic mass (RAM)<br><br>Amount of substance.<br><br>Empirical formula | Develop understanding of relative atomic/molecular mass.<br><br>Calculate RAM from percentage abundance data<br><br>Calculate amount of substance in moles from mass.<br><br>Undertake practical experiments to determine the empirical formula of magnesium oxide and copper oxide | atom, molecule, element compound, mole relative atomic mass, reduction                   | Affixes<br><br>FOCUS                                                       | Development of "word attack" skills (Herron, 1996)<br><br>Sutton (1992)<br><br>DDL (Johns, 1991) |
| 3            | Electron configurations<br><br>Bonding and structure                            | Electron configurations of the first 20 elements determined using $1s^2$ , $2s^2$ etc.<br><br>Introduced to ionic and covalent bonding, giant lattices and molecular structures.                                                                                                    | atom, molecule, element compound, covalent, immiscible, insoluble, electron, $H_2O/OH_2$ | Mini-whiteboards                                                           | Social constructivism and ZPD (Vygotsky, 1962)                                                   |

|   |                                                                      |                                                                                                                                                                                                                                                                     |                                                                                                                         |                                                     |                                                                                                         |
|---|----------------------------------------------------------------------|---------------------------------------------------------------------------------------------------------------------------------------------------------------------------------------------------------------------------------------------------------------------|-------------------------------------------------------------------------------------------------------------------------|-----------------------------------------------------|---------------------------------------------------------------------------------------------------------|
|   |                                                                      | Practical experiments investigate the physical properties of ionic and covalent compounds.                                                                                                                                                                          |                                                                                                                         |                                                     |                                                                                                         |
| 4 | States of matter<br>intermolecular forces<br><br>Shapes of molecules | Kinetic theory discussed as a basis for changes in state.<br><br>Occurrence of different intermolecular forces discussed.<br><br>Shapes of molecules explored e.g tetrahedral, octahedral.                                                                          | atom, molecule, element, compound, solid, liquid, gas, kinetic energy, intermolecular forces, dipoles, hydrogen bonding | Word association.<br><br>FOCUS                      | Social constructivism<br><br>(Vygotsky, 1962)<br><br>DDL (Johns, 1991)<br><br>Word games (Herron, 1996) |
| 5 | The Periodic Table                                                   | Historical development of the Periodic Table and trends in main groups discussed.<br><br>Practical experiments explore trends in group 1 and group 7.                                                                                                               | atom, molecule, element compound, inert                                                                                 | Word origins                                        | Telling the scientific story (Sutton 1992)                                                              |
| 6 | Acids and bases<br><br>Volumetric analysis                           | Students introduced to the pH scale and Brønsted Lowry acid base theory.<br><br>Reactions of acids and bases explored.                                                                                                                                              | acid, base, neutralisation, weak, strong, solution, salt, dissociates                                                   | Word explanations                                   | social constructivism<br><br>(Vygotsky, 1962)                                                           |
| 7 | Mid-term review<br><br>Concentration calculations<br><br>Equilibrium | Content covered reviewed with a formative test.<br><br>titration experiments undertaken and amount of substance from concentration covered.<br><br>Principles of physical and chemical dynamic equilibria illustrated with practical experiments (Iodine and cobalt | acid, base, neutralisation, weak, strong,                                                                               | Extending meaning of <i>pressure</i> .<br><br>FOCUS | social constructivism, ZPD (Vygotsky, 1962)                                                             |

|                |                                      |                                                                                                                                                                                                                                    |                                                                             |                                           |                                                                     |
|----------------|--------------------------------------|------------------------------------------------------------------------------------------------------------------------------------------------------------------------------------------------------------------------------------|-----------------------------------------------------------------------------|-------------------------------------------|---------------------------------------------------------------------|
|                |                                      | chloride).                                                                                                                                                                                                                         |                                                                             |                                           |                                                                     |
| 8              | Oxidation states<br>Rate of reaction | Determining oxidation states of elements in different compounds<br>Factors affecting rate of reaction.<br>Practical assessment laboratory report – effect of temperature / concentration on the reaction of marble chips and acid. | atoms, elements, molecules, compound, acid, base, neutralisation, reduction | Picturing words                           | Social constructivism (Vygotsky, 1962)<br>Word games (Herron, 1996) |
| 9              | Enthalpy changes                     | exothermic and endothermic reactions investigated and enthalpy changes calculated.<br>Hess's Law used to calculate enthalpy changes                                                                                                | Combustion, exothermic, bonds                                               | CLA                                       | Pyburn et al. (2013)                                                |
| 10<br>December | Crude oil Revision                   | introduction of crude oil and fractional distillation                                                                                                                                                                              | Combustion, insoluble, synthesis, molecules, intermolecular forces          | FOCUS and DDL to improve student writing. | Johns (1991)                                                        |

Table 1 Summary of the teaching sequence for the Core Foundation Chemistry module from October to December with the language focused activities and their theoretical basis indicated.

| Week          | Topic                              | Summary content                                                                   | Vocabulary relevant to the CLA                                                          | Language activity                      | Informed by                          |
|---------------|------------------------------------|-----------------------------------------------------------------------------------|-----------------------------------------------------------------------------------------|----------------------------------------|--------------------------------------|
| 11<br>January | Organic chemistry naming compounds | Separation of crude oil revisited and naming of organic compounds explained.      | atom, molecule, element, compound                                                       | word origins - benzene                 | The scientific story – Sutton (1992) |
| 12            | Organic chemistry                  | Practical – aspirin hydrolysis                                                    | Solution, synthesis, terminated, initiated                                              | none                                   |                                      |
| 13            | Alkanes, alkenes and aromatics     | Structure and halogenation of alkanes, alkenes and aromatics including mechanisms | atom, molecule, element, compound, polarity, dipole, electrophile, Br <sub>2</sub> /2Br | multiple contexts – saturated<br>FOCUS | DDL (Johns, 1991)                    |

|           |                                             |                                                                                                                            |                                                                     |                                                     |                                                                     |
|-----------|---------------------------------------------|----------------------------------------------------------------------------------------------------------------------------|---------------------------------------------------------------------|-----------------------------------------------------|---------------------------------------------------------------------|
| 14        | The Victorian Pharmacy                      | Practical - Reactions of alcohols and carbonyls<br>Identifying unknown (Victorian) chemicals                               | atom, molecule, element, compound, reduction, solution              | Key word glossary                                   | Wellington and Osborne (2001)<br>ZPD (Vygotsky, 1962)               |
| 15        | carboxylic acids, esters, fats and polymers | structure and reactions to esters, triglycerides and polymers (addition/condensation)<br>impact of diet and heart disease  | Intermolecular forces, insoluble, saturated                         | Key word glossary                                   | Wellington and Osborne (2001) ZPD (Vygotsky, 1962)                  |
| 16        | electrochemistry                            | Practical – electrolysis of brine<br>constructing electrochemical cells and calculating cell potentials and cell equations | atom, molecule, element, compound, cell                             | Directed Activity Related to Text (DART)            | Wellington and Osborne (2001)                                       |
| 17        | Born-Haber cycles                           | Born-Haber cycles to calculate lattice enthalpy<br>trends in lattice enthalpy                                              | NaCl (aq)/(l), salt, atom, ion, element, compound, complex          | Word explanations                                   | Social constructivism (Vygotsky, 1962)<br>Word games (Herron, 1996) |
| 18        | Thermodynamics                              | Introduction to entropy and Gibbs free energy equation<br>Revision                                                         | Exothermic, spontaneous                                             | Mini-whiteboards                                    | Social constructivism<br>ZPD (Vygotsky, 1992)                       |
|           |                                             | EASTER VACATION – 5 weeks                                                                                                  |                                                                     |                                                     |                                                                     |
| 19        | Acids and bases                             | Calculating pH from hydrogen ion concentration<br>Determining $K_a$ and $pK_a$<br>Calculating pH of a weak acid            | atom, molecule, element, compound, acid, base, solution, weak, salt | multiple contexts – strong and weak<br><b>FOCUS</b> | DDL (Johns, 1991)                                                   |
| 20<br>May | Equilibria                                  | Dynamic equilibrium and Le Châtelier's principle<br>Calculating $K_c$                                                      | Exothermic, molecule, decomposes                                    | CLA                                                 | Pyburn et al. (2013)                                                |

Table 2 Summary of the teaching sequence for the Advanced Chemistry module from January to May with the language focused activities and their theoretical basis indicated

## References

Herron, J. D., 1996. *The Chemistry Classroom*. Washington D.C.: American Chemical Society.

Johns, T., 1991. Should you be persuaded - Two samples of data driven learning materials. *ELR journal*, 4, 1-16.

Pyburn, D. T., Pazicni, S., Benassi, V. A., & Tappin, E. E., 2013. Assessing the relation between language comprehension and performance in general chemistry. *Chemistry Education: Research and Practice*, 14, 524-541.

Sutton, C., 1992. *Words, science and learning*: Open UP.

Vygotsky, L. S., 1962. *Thought and Language*. Cambridge Mass.: MIT Press.

Wellington, J. J., & Osborne, J., 2001. *Language and literacy in science education*. Buckingham: Open University Press.
